# Supplementary material for: Visible light C–H amidation of heteroarenes with benzoyl azides
Source: PubMed Central journal article supplement (PMC5811135; doi:10.1039/c4sc02365j), 2014-10-30
Supplement: SC-006-C4SC02365J-s001.pdf [file SC-006-C4SC02365J-s001.pdf]

# Supporting Information

## Visible Light C-H Amidation of Heteroarenes with Benzoyl Azides

Etienne Brachet, Tamal Ghosh, Indrajit Ghosh and Burkhard König\*

Institut für Organische Chemie, Universität Regensburg, Universitätsstraße 31, D-93053 Regensburg, Germany

page

|                                                                                                              |    |
|--------------------------------------------------------------------------------------------------------------|----|
| <b>1) General Information</b> .....                                                                          | 2  |
| <b>2) General Procedures</b> .....                                                                           | 2  |
| <b>a) Preparation and characterization of acyl azides</b> .....                                              | 2  |
| <b>b) General procedure for the reaction of acyl azide with heteroarenes</b> .....                           | 5  |
| <b>3) Proton and carbon NMR spectra of prepared compounds</b> .....                                          | 13 |
| <b>4) Crystallographic data</b> .....                                                                        | 51 |
| <b>5) Cyclic voltammetry of compound 1b</b> .....                                                            | 53 |
| <b>6) Stern-Volmer analysis for Ru(bpy)<sub>3</sub>Cl<sub>2</sub> x 6 H<sub>2</sub>O + compound 1b</b> ..... | 55 |
| <b>7) Time profile of the reaction of 1b with 2a with and without blue light irradiation</b> .....           | 57 |
| <b>8) GC-MS analysis of crude reaction mixtures</b> .....                                                    | 58 |
| <b>9) References</b> .....                                                                                   | 62 |

## 1) General Information

$^1\text{H}$  NMR spectra were recorded on a Bruker Avance 300 MHz spectrometer in  $\text{CDCl}_3$  or acetone- $d_6$  solution with internal solvent signal as reference.  $^{13}\text{C}$  NMR were recorded on a 75 MHz spectrometer in  $\text{CDCl}_3$  or acetone- $d_6$  solution and referenced to the internal solvent signal.  $^1\text{H}$  NMR data are reported as follows: chemical shift (ppm), multiplicity (s = singlet, d = doublet, t = triplet, q = quartet, quint = quintet, dd = doublet of doublets, ddd = doublet of doublet of doublets, td = triplet of doublets, qd = quartet of doublets, m = multiplet, br. s. = broad singlet), and coupling constants (Hz) and number of protons. All reactions were monitored by thin-layer chromatography using Merck silica gel plates 60 F<sub>254</sub>; visualization was accomplished with short wavelength UV light (254 nm) and/or staining with appropriate stains (anisaldehyde, orthophosphomolybdic acid). Standard flash chromatography was performed using silica gel of particle size 40–63  $\mu\text{m}$ .  $\text{Ru}(\text{bipy})_3\text{Cl}_2 \cdot 6\text{H}_2\text{O}$  was purchased from Sigma Aldrich. All other commercially available reagents and solvents were used without further purification. The blue light irradiation was performed using high-power LEDs (Philips LUXEON® Rebel (1W,  $\lambda_{\text{Ex}} = 455 \pm 15$  nm, 3.5 V, 145 lm, 700mA)).

## 2) General Procedures

### a) Preparation and characterization of acyl azides

General procedure for the preparation of acylazides.



The appropriate benzoyl chloride (5 mmol, 1 equiv) was dissolved in 7 mL of acetone. After cooling the reaction mixture to 0 °C (using an ice bath) sodium azide (5.5 mmol, 1.1 equiv) in 7 mL of water was added dropwise at 0 °C. The resulting mixture was stirred for 2 hours. The resulting mixture was then transferred to a separating funnel and the organic layer was collected, dried over magnesium sulfate and evaporated (note that the temperature of the heating bath should not exceeded 30 °C) to give the corresponding acyl azide. **Caution: It is known that these reagents are potential explosives and must be therefore handled with care and stored in a fridge. It is also recommended to prepare acyl azides at a maximum of 10 mmol scale to avoid risks.**

#### Compound 1a: Benzoyl azide<sup>1</sup>



$^1\text{H}$  NMR (300 MHz, acetone- $d_6$ )  $\delta$  8.07 – 7.97 (m, 2H), 7.78 – 7.66 (m, 1H), 7.61 – 7.50 (m, 2H);  $^{13}\text{C}$  NMR (75 MHz, acetone- $d_6$ )  $\delta$  172.89, 135.39, 131.54, 130.03, 129.77.

**Compound 1b: 4-Methoxybenzoyl azide**<sup>2</sup>

<sup>1</sup>H NMR (300 MHz, acetone-d<sub>6</sub>) δ 7.96 (d, *J* = 9.0 Hz, 2H), 7.05 (d, *J* = 9.0 Hz, 2H), 3.90 (s, 3H); <sup>13</sup>C NMR (75 MHz, acetone-d<sub>6</sub>) δ 171.90, 165.77, 132.35, 123.83, 115.00, 56.10.

**Compound 1c: 1-Naphthoyl azide**<sup>3</sup>

<sup>1</sup>H NMR (300 MHz, acetone-d<sub>6</sub>) δ 8.06 (dd, *J* = 5.1, 4.4 Hz, 1H), 7.90 (dd, *J* = 7.0, 2.3 Hz, 1H), 7.75 (d, *J* = 8.0 Hz, 1H), 7.62 – 7.49 (m, 2H), 7.45 – 7.34 (m, 2H); <sup>13</sup>C NMR (75 MHz, acetone-d<sub>6</sub>) δ 161.34, 136.10, 135.06, 132.22, 129.03, 127.66, 127.57, 126.88, 126.56, 123.17, 123.02.

**Compound 1d: 3,4,5-Trimethoxybenzoyl azide**<sup>4</sup>

Colorless solid; m.p. = 85-87°C; <sup>1</sup>H NMR (300 MHz, acetone-d<sub>6</sub>) δ 7.27 (s, 2H), 3.89 (s, 6H), 3.82 (s, 3H); <sup>13</sup>C NMR (75 MHz, acetone-d<sub>6</sub>) δ 172.13, 154.29, 144.75, 126.30, 107.41, 60.76, 56.57.

**Compound 1e: 4-Cyanobenzoyl azide**<sup>5</sup>

Colorless solid; m.p. = 82-84°C; <sup>1</sup>H NMR (300 MHz, acetone-d<sub>6</sub>) δ 8.17 (d, *J* = 8.7 Hz, 2H), 7.98 (d, *J* = 8.6 Hz, 2H); <sup>13</sup>C NMR (75 MHz, acetone-d<sub>6</sub>) δ 171.92, 135.12, 133.66, 130.60, 118.41, 118.20.

**Compound 1f: Methyl 3-(azidocarbonyl)benzoate**

<sup>1</sup>H NMR (300 MHz, acetone-d<sub>6</sub>) δ 8.56 (t, *J* = 1.5 Hz, 1H), 8.33 – 8.26 (m, 1H), 8.26 – 8.18 (m, 1H), 7.71 (t, *J* = 7.8 Hz, 1H), 3.94 (s, 3H); <sup>13</sup>C NMR (75 MHz, acetone-d<sub>6</sub>) δ 172.23, 166.16, 135.67, 134.13, 132.02, 131.90, 130.63, 130.36, 52.79.

**Compound 1g: 4-Chlorobenzoyl azide**<sup>6</sup>



<sup>1</sup>H NMR (300 MHz, acetone-d<sub>6</sub>) δ 8.00 (d, *J* = 8.8 Hz, 2H), 7.59 (d, *J* = 8.8 Hz, 2H); <sup>13</sup>C NMR (75 MHz, acetone-d<sub>6</sub>) δ 172.00, 141.18, 131.71, 130.26, 130.01.

**Compound 1h: Thiophene-3-carbonyl azide**<sup>1</sup>



<sup>1</sup>H NMR (300 MHz, acetone-d<sub>6</sub>) δ 8.61 – 7.99 (m, 1H), 7.77 – 7.20 (m, 2H); <sup>13</sup>C NMR (75 MHz, acetone-d<sub>6</sub>) δ 167.81, 135.67, 135.23, 128.60, 127.97.

**Compound 1i: 2-Phenylacetyl azide**<sup>7</sup>



<sup>1</sup>H NMR (300 MHz, acetone-d<sub>6</sub>) δ 7.35 – 7.24 (m, 1H), 4.38 (d, *J* = 6.2 Hz, 1H); <sup>13</sup>C NMR (75 MHz, acetone-d<sub>6</sub>) δ 156.98, 139.59, 129.28, 128.30, 128.05, 45.14.

**Compound 1j: Cinnamoyl azide**<sup>1</sup>



<sup>1</sup>H NMR (300 MHz, acetone-d<sub>6</sub>) δ 7.85 – 7.68 (m, 1H), 7.56 – 7.34 (m, 1H), 6.59 (d, *J* = 15.9 Hz, 1H); <sup>13</sup>C NMR (75 MHz, acetone-d<sub>6</sub>) δ 172.34, 147.36, 134.83, 132.01, 129.93, 129.61, 119.89.

**Compound 1k: 4-Methylbenzenesulfonyl azide**<sup>8</sup>



<sup>1</sup>H NMR (300 MHz, acetone-d<sub>6</sub>) δ 7.91 (d, *J* = 8.4 Hz, 2H), 7.57 (d, *J* = 8.6 Hz, 2H), 2.50 (s, 2H); <sup>13</sup>C NMR (75 MHz, acetone-d<sub>6</sub>) δ 147.52, 136.40, 131.39, 128.33, 21.62.

## b) General procedure for the reaction of acyl azide with heteroarenes



In a 5 mL snap vial equipped with magnetic stirring bar Ru(bipy)<sub>3</sub>Cl<sub>2</sub>·6H<sub>2</sub>O, (0.025 equiv), benzoyl azide (1 equiv), H<sub>3</sub>PO<sub>4</sub> (2 equiv) and the heteroarene (5 equiv) were dissolved in dry DMSO (0.09 mmol/mL) and the resulting mixture was degassed by “pump-freeze-thaw” cycles (×2) via a syringe needle and filled with nitrogen. The vial was irradiated through the vial’s plane bottom side using blue LEDs. After complete conversion of the starting material (monitored by TLC) the pressure inside the vial was released by a syringe needle and the reaction mixture was transferred into a separating funnel, diluted with ethyl acetate and washed with 15 mL of water. The aqueous layer was washed three times with ethyl acetate. The combined organic layers were dried over MgSO<sub>4</sub>, filtered and concentrated in vacuum. Purification of the crude product was achieved by flash column chromatography using petrol ether/ethyl acetate as eluent. NMR spectra of the compounds were typically recorded in acetone-d<sub>6</sub>, because of their limited stability in CDCl<sub>3</sub>.

### Compound 3a: *N*-(1-Methyl-1H-pyrrol-2-yl)benzamide



65%,  $R_f$  = 0.30 (PE:EA, 7:3); viscous oil; <sup>1</sup>H NMR (300 MHz, CDCl<sub>3</sub>) δ 7.88 (d,  $J$  = 7.3 Hz, 2H), 7.61 – 7.53 (m, 2H), 7.48 (t,  $J$  = 7.4 Hz, 1H), 6.58 (m, 1H), 6.12 (t,  $J$  = 3.3 Hz, 1H), 6.05 (m, 1H), 3.52 (s, 3H); <sup>13</sup>C NMR (75 MHz, CDCl<sub>3</sub>) δ 167.55, 133.75, 132.24, 128.89, 127.43, 124.84, 120.19, 106.78, 104.11, 33.12; HR-MS (ESI):  $m/z$  calculated for C<sub>12</sub>H<sub>13</sub>N<sub>2</sub>O 201,1028 obtained 201,1024.

### Compound 3b: 4-Methoxy-*N*-(1-methyl-1H-pyrrol-2-yl)benzamide



71%,  $R_f$  = 0.25 (PE:EA, 7:3); colorless solid; m.p. = 109–111°C; <sup>1</sup>H NMR (300 MHz, CDCl<sub>3</sub>) δ 7.85 (d,  $J$  = 8.3 Hz, 2H), 7.47 (brs, 1H), 6.96 (d,  $J$  = 8.6 Hz, 2H), 6.57 (m, 1H), 6.11 (t,  $J$  = 3.3 Hz, 1H), 6.03 (m, 1H), 3.87 (s, 3H), 3.51 (s, 3H); <sup>13</sup>C NMR (75 MHz, CDCl<sub>3</sub>) δ 167.03, 162.78, 129.36, 125.90, 125.05, 120.14, 114.06, 106.75, 104.09, 55.61, 33.13; HR-MS (ESI):  $m/z$  calculated for C<sub>13</sub>H<sub>15</sub>N<sub>2</sub>O<sub>2</sub> 231,1128 obtained 231,1133.

**Compound 3c: *N*-(1-Methyl-1H-pyrrol-2-yl)-1-naphthamide**



47%,  $R_f = 0.25$  (PE:EA, 7:3); colorless solid; m.p. = 150-152°C;  $^1\text{H NMR}$  (300 MHz, Aceton)  $\delta$  9.16 (brs, 1H), 8.47 – 8.40 (m, 1H), 8.09 – 7.96 (m, 2H), 7.89 (d,  $J = 6.8$  Hz, 1H), 7.65 – 7.52 (m, 3H), 6.62 (s, 1H), 6.06 (s, 1H), 6.01 (t,  $J = 3.3$  Hz, 1H), 3.65 (s, 3H);  $^{13}\text{C NMR}$  (75 MHz, acetone)  $\delta$  169.30, 134.69, 131.41, 131.34, 130.72, 129.15, 127.74, 127.19, 127.05, 126.50, 126.47, 125.69, 119.95, 106.73, 103.80, 33.28; HR-MS (ESI): m/z calculated for  $\text{C}_{16}\text{H}_{15}\text{N}_2\text{O}$  251,1179 obtained 251,1178.

**Compound 3d: 3,4,5-Trimethoxy-*N*-(1-methyl-1H-pyrrol-2-yl)benzamide**



54%,  $R_f = 0.15$  (PE:EA, 7:3); colorless solid; m.p. = 200-202°C;  $^1\text{H NMR}$  (300 MHz, DMSO- $d_6$ )  $\delta$  9.89 (s, 1H), 7.32 (s, 2H), 6.74 – 6.57 (m, 1H), 6.00 – 5.94 (m, 1H), 5.87 (dd,  $J = 3.4, 1.9$  Hz, 1H), 3.85 (s, 6H), 3.72 (s, 3H), 3.42 (s, 3H);  $^{13}\text{C NMR}$  (75 MHz, DMSO- $d_6$ )  $\delta$  165.85, 152.69, 140.36, 128.78, 125.94, 119.44, 105.73, 105.19, 103.24, 60.14, 56.05, 32.62; HR-MS (ESI): m/z calculated for  $\text{C}_{15}\text{H}_{19}\text{N}_2\text{O}_4$  291,1339 obtained 291,1340.

**Compound 3e: 4-Cyano-*N*-(1-methyl-1H-pyrrol-2-yl)benzamide**



63%,  $R_f = 0.25$  (PE:EA, 7:3); colorless solid; m.p. = 215-217°C;  $^1\text{H NMR}$  (300 MHz, acetone- $d_6$ )  $\delta$  9.40 (brs, 1H), 8.19 (d,  $J = 8.4$  Hz, 2H), 7.95 (d,  $J = 8.5$  Hz, 2H), 6.72 – 6.47 (m, 1H), 6.14 – 5.75 (m, 2H), 3.54 (s, 3H);  $^{13}\text{C NMR}$  (75 MHz, acetone- $d_6$ )  $\delta$  165.98, 164.36, 139.18, 133.28, 129.34, 120.24, 118.78, 115.79, 106.78, 104.02, 33.16; HR-MS (ESI): m/z calculated for  $\text{C}_{13}\text{H}_{12}\text{N}_3\text{O}$  226,0981 obtained 226,0975.

**Compound 3f: Methyl 3-((1-methyl-1H-pyrrol-2-yl)carbamoyl)benzoate**



46%,  $R_f = 0.22$  (PE:EA, 7:3); colorless solid; m.p. = 197-199°C;  $^1\text{H NMR}$  (300 MHz, acetone- $d_6$ )  $\delta$  9.42 (brs, 1H), 8.63 (s, 1H), 8.27 (m, 1H), 8.22 – 8.13 (m, 1H), 7.67 (t,  $J = 7.8$  Hz, 1H), 6.66 – 6.46 (m, 1H), 5.98 (t,  $J = 3.3$  Hz, 1H), 5.94 (m, 1H), 3.92 (s, 3H), 3.53 (s, 3H);  $^{13}\text{C NMR}$  (75 MHz,

acetone- $d_6$ )  $\delta$  166.66, 166.56, 135.64, 133.08, 132.87, 131.45, 129.77, 129.31, 126.72, 120.14, 106.70, 104.04, 52.62, 33.15; HR-MS (ESI):  $m/z$  calculated for  $C_{14}H_{15}N_2O_3$  259,1077 obtained 259,1079.

### Compound 3g: 4-Chloro-*N*-(1-methyl-1H-pyrrol-2-yl)benzamide



61%,  $R_f$  = 0.25 (PE:EA, 7:3); colorless solid; m.p. = 186-188°C;  $^1H$  NMR (300 MHz,  $CDCl_3$ )  $\delta$  7.79 (d,  $J$  = 8.3 Hz, 2H), 7.73 (brs, 1H), 7.43 (d,  $J$  = 8.4 Hz, 2H), 6.56 (m, 1H), 6.10 (t,  $J$  = 3.2 Hz, 1H), 6.02 (m, 1H), 3.47 (s, 3H);  $^{13}C$  NMR (75 MHz,  $CDCl_3$ )  $\delta$  166.63, 138.51, 132.02, 129.11, 128.92, 124.55, 120.28, 106.82, 104.22, 33.09; HR-MS (ESI):  $m/z$  calculated for  $C_{12}H_{12}ClN_2O$  235,0637 obtained 235,0633.

### Compound 3h: *N*-(1-Methyl-1H-pyrrol-2-yl)thiophene-3-carboxamide



49%,  $R_f$  = 0.23 (PE:EA, 7:3); colorless solid; m.p. = 157-159°C;  $^1H$  NMR (300 MHz, acetone- $d_6$ )  $\delta$  9.04 (s, 1H), 8.32 – 8.15 (m, 1H), 7.64 (m, 1H), 7.56 (dd,  $J$  = 5.0, 2.9 Hz, 1H), 6.64 – 6.49 (m, 1H), 5.96 (t,  $J$  = 3.3 Hz, 1H), 5.88 (ddd,  $J$  = 3.6, 1.9, 0.6 Hz, 1H), 3.49 (s, 3H);  $^{13}C$  NMR (75 MHz, acetone- $d_6$ )  $\delta$  163.00, 138.32, 129.91, 127.90, 127.35, 126.77, 120.05, 106.65, 104.09, 33.09; HR-MS (ESI):  $m/z$  calculated for  $C_{10}H_{11}N_2OS$  207,0587 obtained 207,0588.

### Compound 3j: *N*-(4-Acetyl-1-methyl-1H-pyrrol-2-yl)benzamide



65%,  $R_f$  = 0.25 (PE:EA, 7:3); colorless solid; m.p. = 124-126°C;  $^1H$  NMR (300 MHz, acetone- $d_6$ )  $\delta$  9.85 (s, 1H), 8.08 (dd,  $J$  = 6.9, 1.6 Hz, 2H), 7.69 – 7.50 (m, 3H), 6.67 (d,  $J$  = 3.3 Hz, 1H), 6.53 (d,  $J$  = 3.3 Hz, 1H), 3.62 (s, 3H), 2.30 (s, 3H);  $^{13}C$  NMR (75 MHz, acetone- $d_6$ )  $\delta$  194.11, 167.06, 134.65, 133.09, 132.87, 129.59, 128.58, 120.55, 115.82, 108.75, 34.77, 27.70; HR-MS (ESI):  $m/z$  calculated for  $C_{14}H_{14}N_2O_2$  243,1128 obtained 243,1129.

**Compound 3k: 4-Methoxy-N-(1-phenyl-1H-pyrrol-2-yl)benzamide**

72%,  $R_f = 0.25$  (PE:EA, 7:3); colorless solid; m.p. = 183-185°C;  $^1\text{H NMR}$  (300 MHz, acetone- $d_6$ )  $\delta$  8.95 (brs, 1H), 7.86 (d,  $J = 8.5$  Hz, 2H), 7.46 – 7.35 (m, 4H), 7.33 – 7.25 (m, 1H), 6.97 (d,  $J = 8.8$  Hz, 2H), 6.89 – 6.77 (m, 1H), 6.21 (t,  $J = 3.4$  Hz, 1H), 6.17 (d,  $J = 1.1$  Hz, 1H), 3.85 (s, 3H);  $^{13}\text{C NMR}$  (75 MHz, acetone- $d_6$ )  $\delta$  167.09, 163.37, 137.46, 130.21, 129.96, 127.61, 127.44, 125.69, 120.23, 114.44, 108.56, 107.01, 106.15, 55.82; HR-MS (ESI):  $m/z$  calculated for  $\text{C}_{18}\text{H}_{17}\text{N}_2\text{O}_2$  293,1285 obtained 293,1284.

**Compound 3l: 4-Methoxy-N-(1H-pyrrol-2-yl)benzamide**

69%,  $R_f = 0.10$  (PE:EA, 7:3); colorless solid; m.p. = 179-181°C;  $^1\text{H NMR}$  (300 MHz, DMSO- $d_6$ )  $\delta$  10.75 (brs, 1H), 10.42 (brs, 1H), 7.94 (d,  $J = 8.8$  Hz, 2H), 7.05 (d,  $J = 8.9$  Hz, 2H), 6.64 – 6.21 (m, 1H), 5.93 (dd,  $J = 5.6, 2.6$  Hz, 1H), 5.83 (d,  $J = 1.4$  Hz, 1H), 3.83 (s, 3H);  $^{13}\text{C NMR}$  (75 MHz, DMSO- $d_6$ )  $\delta$  163.44, 161.86, 129.32, 128.13, 126.20, 113.71, 112.63, 106.30, 96.06, 55.45; HR-MS (ESI):  $m/z$  calculated for  $\text{C}_{12}\text{H}_{13}\text{N}_2\text{O}_2$  217,0972 obtained 217,0975.

**Compound 3m: 4-Methoxy-N-(1-(4-methoxybenzoyl)-1H-pyrrol-2-yl)benzamide**

64%,  $R_f = 0.30$  (PE:EA, 7:3); colorless solid; m.p. = 151-153°C;  $^1\text{H NMR}$  (300 MHz,  $\text{CDCl}_3$ )  $\delta$  11.09 (s, 1H), 7.92 (d,  $J = 8.9$  Hz, 2H), 7.77 (d,  $J = 8.9$  Hz, 2H), 7.04 – 6.92 (m, 5H), 6.68 (dd,  $J = 3.6, 1.7$  Hz, 1H), 6.24 (t,  $J = 3.6$  Hz, 1H), 3.90 (s, 3H), 3.86 (s, 3H);  $^{13}\text{C NMR}$  (75 MHz,  $\text{CDCl}_3$ )  $\delta$  171.58, 163.45, 163.12, 162.65, 132.22, 129.11, 126.26, 125.47, 117.48, 114.11, 114.03, 111.98, 111.97, 101.60, 55.72, 55.57; HR-MS (ESI):  $m/z$  calculated for  $\text{C}_{20}\text{H}_{19}\text{N}_2\text{O}_4$  351,1339 obtained 351,1339.

**Compound 3n: 4-Methoxy-N-(5-methylfuran-2-yl)benzamide**

49%,  $R_f = 0.25$  (PE:EA, 7:3); colorless solid; m.p. = 122-124°C;  $^1\text{H NMR}$  (300 MHz, acetone- $d_6$ )  $\delta$  9.89 (brs, 1H), 8.03 (d,  $J = 8.9$  Hz, 2H), 7.19 – 6.92 (m,  $J = 8.9$  Hz, 2H), 6.24 (d,  $J = 3.1$  Hz, 1H), 6.00 (d,  $J = 2.9$  Hz, 1H), 3.88 (s, 3H), 2.21 (s, 3H);  $^{13}\text{C NMR}$  (75 MHz, acetone- $d_6$ )  $\delta$  163.61, 163.49, 146.18,

145.31, 130.28, 126.95, 114.50, 107.61, 96.68, 55.83, 13.20; HR-MS (ESI): m/z calculated for C<sub>13</sub>H<sub>14</sub>NO<sub>3</sub> 232,0968 obtained 232,0969.

**Compound 3o: N-(Benzofuran-2-yl)-4-methoxybenzamide**<sup>9</sup>



15%,  $R_f = 0.25$  (PE:EA, 7:3); colorless solid; m.p. = 145-147°C; <sup>1</sup>H NMR (300 MHz, acetone-d<sub>6</sub>) δ 7.94 (d,  $J = 9.0$  Hz, 2H), 7.59 – 7.52 (m, 1H), 7.36 – 7.27 (m, 1H), 7.05 – 6.94 (m, 3H), 6.89 (d,  $J = 8.2$  Hz, 1H), 6.73 (d,  $J = 6.7$  Hz, 1H), 6.27 (d,  $J = 6.7$  Hz, 1H), 3.86 (s, 3H); <sup>13</sup>C NMR (75 MHz, acetone-d<sub>6</sub>) δ 164.76, 163.87, 163.63, 130.57, 129.00, 128.52, 126.51, 126.06, 124.02, 123.34, 120.88, 114.66, 110.78, 90.47, 55.91; HR-MS (ESI): m/z calculated for C<sub>16</sub>H<sub>14</sub>NO<sub>4</sub> 268,0968 obtained 268,0968.

**Compound 3p: N-(1-(Dimethylamino)-1H-pyrrol-2-yl)-4-methoxybenzamide**



59% ( 75mg ),  $R_f = 0.25$  (PE:EA, 7:3); colorless solid; m.p. = 117-119°C; <sup>1</sup>H NMR (300 MHz, acetone-d<sub>6</sub>) δ 9.05 (brs, 1H), 7.91 (d,  $J = 8.8$  Hz, 2H), 7.04 (d,  $J = 8.8$  Hz, 2H), 6.90 (dd,  $J = 3.3, 1.9$  Hz, 1H), 6.23 (dd,  $J = 3.8, 1.8$  Hz, 1H), 6.02 (t,  $J = 3.6$  Hz, 1H), 3.87 (s, 3H), 2.82 (s, 3H); <sup>13</sup>C NMR (75 MHz, acetone-d<sub>6</sub>) δ 163.24, 162.95, 129.79, 127.75, 127.43, 114.58, 108.53, 106.54, 94.59, 55.82, 47.72; HR-MS (ESI): m/z calculated for C<sub>14</sub>H<sub>18</sub>N<sub>3</sub>O<sub>2</sub> 260,1394 obtained 260,1399.

**Compound 3q: N-(4-Acetyl-1-methyl-1H-pyrrol-2-yl)-4-chlorobenzamide**



46%,  $R_f = 0.25$  (PE:EA, 7:3); colorless solid; m.p. = 163-165°C; <sup>1</sup>H NMR (300 MHz, acetone-d<sub>6</sub>) δ 9.85 (brs, 1H), 8.09 (d,  $J = 8.6$  Hz, 2H), 7.61 (d,  $J = 8.6$  Hz, 2H), 6.68 (d,  $J = 3.3$  Hz, 1H), 6.53 (d,  $J = 3.3$  Hz, 1H), 3.61 (s, 3H), 2.30 (s, 3H); <sup>13</sup>C NMR (75 MHz, acetone-d<sub>6</sub>) δ 194.04, 166.15, 138.68, 133.38, 132.34, 130.41, 129.72, 120.63, 116.05, 108.82, 34.65, 27.73; HR-MS (ESI): m/z calculated for C<sub>14</sub>H<sub>14</sub>ClN<sub>2</sub>O<sub>2</sub> 277,0738 obtained 277,0741.

### Compound 3r: 4-Chloro-*N*-(1-phenyl-1H-pyrrol-2-yl)benzamide



88%,  $R_f = 0.38$  (PE:EA, 7:3); colorless solid; m.p. = 195-197°C;  $^1\text{H}$  NMR (300 MHz, acetone- $d_6$ )  $\delta$  9.22 (s, 1H), 7.88 (d,  $J = 8.5$  Hz, 3H), 7.49 (d,  $J = 8.5$  Hz, 3H), 7.42 (d,  $J = 4.4$  Hz, 6H), 7.31 (dd,  $J = 8.5, 4.3$  Hz, 2H), 6.92 – 6.82 (m, 2H), 6.27 – 6.17 (m, 3H);  $^{13}\text{C}$  NMR (75 MHz, acetone- $d_6$ )  $\delta$  166.66, 140.09, 138.07, 133.95, 130.16, 130.04, 129.46, 127.75, 126.24, 125.70, 120.50, 108.66, 107.07; HR-MS (ESI):  $m/z$  calculated for  $\text{C}_{17}\text{H}_{14}\text{ClN}_2\text{O}$  277,0789 obtained 277,0788.

### Compound 3s: 4-Chloro-*N*-(1-methyl-1H-indol-2-yl)benzamide



59%,  $R_f = 0.25$  (PE:EA, 7:3); colorless solid; m.p. = 190-192°C;  $^1\text{H}$  NMR (300 MHz, acetone- $d_6$ )  $\delta$  9.74 (brs, 1H), 8.09 (d,  $J = 8.5$  Hz, 2H), 7.59 (d,  $J = 8.6$  Hz, 2H), 7.52 (d,  $J = 7.9$  Hz, 2H), 7.37 (d,  $J = 8.2$  Hz, 1H), 7.19 – 7.10 (m, 1H), 7.09 – 6.99 (m, 1H), 6.50 (s, 1H), 3.72 (s, 3H);  $^{13}\text{C}$  NMR (75 MHz, acetone- $d_6$ )  $\delta$  166.01, 143.07, 138.36, 135.90, 133.74, 130.46, 129.53, 127.92, 121.76, 120.77, 120.30, 110.05, 95.58, 29.53.  
; HR-MS (ESI):  $m/z$  calculated for  $\text{C}_{16}\text{H}_{14}\text{ClN}_2\text{O}$  287,0764 obtained 287,0764.

### Compound 3t: 4-Chloro-*N*-(5-methylthiophen-2-yl)benzamide



35%,  $R_f = 0.29$  (PE:EA, 7:3); colorless solid; m.p. = 167-169°C;  $^1\text{H}$  NMR (300 MHz, acetone- $d_6$ )  $\delta$  10.64 (brs, 1H), 8.01 (d,  $J = 8.6$  Hz, 2H), 7.55 (d,  $J = 8.6$  Hz, 2H), 6.67 (d,  $J = 3.7$  Hz, 1H), 6.54 (d,  $J = 3.6$  Hz, 1H), 2.40 (s, 3H);  $^{13}\text{C}$  NMR (75 MHz, acetone- $d_6$ )  $\delta$  162.85, 138.45, 138.13, 133.29, 131.78, 130.09, 129.54, 122.56, 112.66, 14.74; HR-MS (ESI):  $m/z$  calculated for  $\text{C}_{12}\text{H}_{11}\text{ClNOS}$  252,0244 obtained 252,0249.

### Compound 3u: 4-Cyano-*N*-(1,3-dimethyl-1H-indol-2-yl)benzamide



61%,  $R_f = 0.22$  (PE:EA, 7:3); colorless solid; m.p. = 199-201°C;  $^1\text{H}$  NMR (300 MHz, acetone- $d_6$ )  $\delta$  9.78 (brs, 1H), 8.28 (d,  $J = 8.5$  Hz, 2H), 7.99 (d,  $J = 8.5$  Hz, 2H), 7.52 (d,  $J = 7.9$  Hz, 1H), 7.36 (d,  $J =$

8.2 Hz, 1H), 7.23 – 7.11 (m, 1H), 7.06 (dd,  $J = 11.0, 4.0$  Hz, 1H), 3.66 (s, 3H), 2.21 (s, 3H);  $^{13}\text{C}$  NMR (75 MHz, acetone- $d_6$ )  $\delta$  166.16, 138.85, 135.82, 133.39, 130.23, 129.49, 127.92, 122.30, 119.62, 119.29, 118.76, 116.06, 109.98, 104.28, 30.35, 8.51; HR-MS (ESI):  $m/z$  calculated for  $\text{C}_{18}\text{H}_{16}\text{N}_3\text{O}$  290,1288 obtained 290,1284.

### Compound 3v: 4-Cyano-*N*-(5-methylfuran-2-yl)benzamide



44%,  $R_f = 0.25$  (PE:EA, 7:3); colorless solid; m.p. = 139-141°C;  $^1\text{H}$  NMR (300 MHz,  $\text{CDCl}_3$ )  $\delta$  8.42 (brs, 1H), 7.97 (d,  $J = 8.4$  Hz, 2H), 7.76 (d,  $J = 8.3$  Hz, 2H), 6.33 (d,  $J = 2.7$  Hz, 1H), 5.99 (d,  $J = 2.1$  Hz, 1H), 2.23 (s, 3H);  $^{13}\text{C}$  NMR (75 MHz,  $\text{CDCl}_3$ )  $\delta$  161.78, 146.13, 142.85, 137.43, 132.74, 127.98, 117.99, 115.71, 107.42, 97.68, 13.42; HR-MS (ESI):  $m/z$  calculated for  $\text{C}_{12}\text{H}_{12}\text{N}_2\text{O}_2$  227,0742 obtained 227,0744.

### Compound 3w: *N*-(1-Phenyl-1H-pyrrol-2-yl)cinnamamide



55%,  $R_f = 0.25$  (PE:EA, 7:3); colorless solid; m.p. = 213-215°C;  $^1\text{H}$  NMR (300 MHz, acetone- $d_6$ )  $\delta$  8.80 (brs, 1H), 7.58 (dd,  $J = 9.8, 5.8$  Hz, 2H), 7.49 – 7.30 (m, 9H), 6.84 – 6.70 (m, 2H), 6.27 (d,  $J = 1.6$  Hz, 1H), 6.20 (t,  $J = 3.4$  Hz, 1H);  $^{13}\text{C}$  NMR (75 MHz, acetone- $d_6$ )  $\delta$  165.42, 143.01, 141.64, 139.89, 135.93, 130.52, 130.11, 129.74, 128.61, 127.80, 125.87, 121.88, 119.81, 108.64, 105.56; HR-MS (ESI):  $m/z$  calculated for  $\text{C}_{19}\text{H}_{17}\text{N}_2\text{O}$  289,1335 obtained 289,1336.

### Compound 3x: 4-Methyl-*N*-(1-methyl-1H-pyrrol-2-yl)benzenesulfonamide



52%,  $R_f = 0.23$  (PE:EA, 7:3); colorless solid; m.p. = 157-159°C;  $^1\text{H}$  NMR (300 MHz, acetone- $d_6$ )  $\delta$  9.04 (s, 1H), 8.32 – 8.15 (m, 1H), 7.64 (m, 1H), 7.56 (dd,  $J = 5.0, 2.9$  Hz, 1H), 6.64 – 6.49 (m, 1H), 5.96 (t,  $J = 3.3$  Hz, 1H), 5.88 (ddd,  $J = 3.6, 1.9, 0.6$  Hz, 1H), 3.49 (s, 3H);  $^{13}\text{C}$  NMR (75 MHz, acetone- $d_6$ )  $\delta$  163.00, 138.32, 129.91, 127.90, 127.35, 126.77, 120.05, 106.65, 104.09, 33.09; HR-MS (ESI):  $m/z$  calculated for  $\text{C}_{12}\text{H}_{15}\text{N}_2\text{O}_2\text{S}$  251,0849 obtained 251,0850.

**Compound 6: 4-Chloro-N-(3-methyl-1-phenyl-1H-indol-2-yl)benzamide**

65%,  $R_f = 0.70$  (PE:EA, 7:3); colorless solid; m.p. = 213-215°C;  $^1\text{H NMR}$  (300 MHz, acetone- $d_6$ )  $\delta$  9.51 (brs, 1H), 7.91 (d,  $J = 8.5$  Hz, 2H), 7.65 – 7.56 (m, 1H), 7.53 – 7.33 (m, 7H), 7.24 – 7.10 (m, 3H), 2.27 (s, 3H);  $^{13}\text{C NMR}$  (75 MHz, acetone- $d_6$ )  $\delta$  166.58, 143.84, 138.24, 137.95, 136.08, 133.63, 131.90, 130.22, 130.14, 129.49, 128.47, 128.15, 127.98, 123.20, 120.69, 119.62, 110.67, 108.17, 8.55; HR-MS (ESI): m/z calculated for  $\text{C}_{22}\text{H}_{18}\text{ClN}_2\text{O}$  363,1081 obtained 363,1084.

**Compound 8: 2-(4-Chlorophenyl)-4-methyl-4-phenyl-4,5-dihydrooxazole**

55%,  $R_f = 0.35$  (PE:EA, 7:3); colorless oil,  $^1\text{H NMR}$  (400 MHz, acetone- $d_6$ )  $\delta$  8.08 (d,  $J = 8.7$  Hz, 2H), 7.58 (d,  $J = 8.8$  Hz, 2H), 7.54 – 7.49 (m, 2H), 7.46 – 7.39 (m, 2H), 7.38 – 7.30 (m, 1H), 4.20 (d,  $J = 14.9$  Hz, 1H), 4.11 (d,  $J = 14.9$  Hz, 1H), 1.82 (s, 3H);  $^{13}\text{C NMR}$  (101 MHz, acetone- $d_6$ )  $\delta$  162.04, 146.75, 137.71, 130.53, 129.55, 129.41, 128.18, 128.10, 125.11, 87.84, 69.76, 28.48; HR-MS (ESI): m/z calculated for  $\text{C}_{16}\text{H}_{15}\text{ClNO}$  273,0869 obtained 273,0875.

**Compound 9: 2-(4-Methoxyphenyl)-3a,8b-dihydrobenzofuro[2,3-d]oxazole**

35%,  $R_f = 0.7$  (PE:EA, 7:3); colorless solid; m.p. = 150-152°C;  $^1\text{H NMR}$  (300 MHz, acetone- $d_6$ )  $\delta$  7.94 (d,  $J = 9.0$  Hz, 2H), 7.63 – 7.48 (m, 1H), 7.39 – 7.25 (m, 1H), 7.06 – 6.94 (m, 3H), 6.89 (d,  $J = 8.2$  Hz, 1H), 6.73 (d,  $J = 6.7$  Hz, 1H), 6.27 (d,  $J = 6.7$  Hz, 1H), 3.86 (s, 3H);  $^{13}\text{C NMR}$  (75 MHz, acetone- $d_6$ )  $\delta$  167.50, 163.93, 160.01, 132.48, 131.46, 127.85, 124.89, 121.95, 120.01, 114.77, 111.48, 105.55, 83.63, 55.85; HR-MS (ESI): m/z calculated for  $\text{C}_{16}\text{H}_{14}\text{NO}_3$  269,1001 obtained 269,1001.

### **3) Proton and carbon NMR spectra of prepared compounds**



### Compound 1a: benzoyl azide





### Compound 1b: 4-methoxybenzoyl azide





### Compound 1c: 1-naphthoyl azide





**Compound 1d: 3,4,5-trimethoxybenzoyl azide**





**Compound 1e: 4-cyanobenzoyl azide**





**Compound 1f: methyl 3-(azidocarbonyl)benzoate**





### Compound 1g: 4-chlorobenzoyl azide





### Compound 1h: thiophene-3-carbonyl azide





### Compound 1i: 2-phenylacetyl azide





**Compound 1j: cinnamoyl azide**





### Compound 1k: 4-methylbenzenesulfonyl azide





### Compound 3a: N-(1-methyl-1H-pyrrol-2-yl)benzamide





**Compound 3b: 4-methoxy-N-(1-methyl-1H-pyrrol-2-yl)benzamide**





**Compound 3c: N-(1-methyl-1H-pyrrol-2-yl)-1-naphthamide**





**Compound 3d: 3,4,5-trimethoxy-N-(1-methyl-1H-pyrrol-2-yl)benzamide**





**Compound 3e: 4-cyano-N-(1-methyl-1H-pyrrol-2-yl)benzamide**





**Compound 3f: methyl 3-((1-methyl-1H-pyrrol-2-yl)carbamoyl)benzoate**





### Compound 3g: 4-chloro-N-(1-methyl-1H-pyrrol-2-yl)benzamide





**Compound 3h: N-(1-methyl-1H-pyrrol-2-yl)thiophene-3-carboxamide**





**Compound 3j: N-(4-acetyl-1-methyl-1H-pyrrol-2-yl)benzamide**





**Compound 3k: 4-methoxy-N-(1-phenyl-1H-pyrrol-2-yl)benzamide**





**Compound 3l: 4-methoxy-N-(1H-pyrrol-2-yl)benzamide**





**Compound 3m: 4-methoxy-N-(1-(4-methoxybenzoyl)-1H-pyrrol-2-yl)benzamide**





**Compound 3n: 4-methoxy-N-(5-methylfuran-2-yl)benzamide**





**Compound 3o: N-(benzofuran-2-yl)-4-methoxybenzamide**





**Compound 3p: N-(1-(dimethylamino)-1H-pyrrol-2-yl)-4-methoxybenzamide**





**Compound 3q: N-(4-acetyl-1-methyl-1H-pyrrol-2-yl)-4-chlorobenzamide**





**Compound 3r: 4-chloro-N-(1-phenyl-1H-pyrrol-2-yl)benzamide**





**Compound 3s: 4-chloro-N-(1-methyl-1H-indol-2-yl)benzamide**





**Compound 3t: 4-chloro-N-(5-methylthiophen-2-yl)benzamide**





**Compound 3u: 4-cyano-N-(1,3-dimethyl-1H-indol-2-yl)benzamide**





**Compound 3v: 4-cyano-N-(5-methylfuran-2-yl)benzamide**





**Compound 3w: N-(1-phenyl-1H-pyrrol-2-yl)cinnamamide**





**Compound 3x: 4-methyl-N-(1-methyl-1H-pyrrol-2-yl)benzenesulfonamide**





**Compound 6: 4-chloro-N-(3-methyl-1-phenyl-1H-indol-2-yl)benzamide**





**Compound 8: 2-(4-chlorophenyl)-4-methyl-4-phenyl-4,5-dihydrooxazole**





**Compound 9: 2-(4-methoxyphenyl)-3a,8b-dihydrobenzofuro[2,3-d]oxazole**



## 4) Crystallographic data

### Compound 8



**Bond precision: C-C = 0.0020 Å Wavelength=1.54184**

**Cell: a=11.6434(3) b=10.03245(18) c=20.8570(4)**

**alpha=90 beta=103.161(2) gamma=90**

**Temperature: 123 K**

**Calculated Reported**

**Volume 2372.35(9) 2372.35(8)**

**Space group P 21/c P 1 21/c 1**

**Hall group -P 2ybc -P 2ybc**

**Moiety formula C13 H14 N2 O2 C13 H14 N2 O2**

**Sum formula C13 H14 N2 O2 C13 H14 N2 O2**

**Mr 230.26 230.26**

**Dx,g cm-3 1.289 1.289**

**Z 8 8**

**Mu (mm-1) 0.719 0.719**

**F000 976.0 976.0**

**F000' 978.98**

**h,k,lmax 13,11,24 13,11,24**

**Nref 3888 3758**

**Tmin,Tmax 0.912,0.974 0.991,0.997**

**Tmin' 0.908**

**Correction method= ANALYTICAL**

Data completeness= 0.967 Theta(max)= 63.480  
R(reflections)= 0.0366( 3356) wR2(reflections)= 0.1027( 3758)  
S = 1.040 Npar= Npar = 367



## 5) Cyclic voltammetry of compound 1b

Measurements were carried out with an **Autolab PGSTAT302N Metrohm**

Working electrode: Glassy Carbon

Counter electrode: Platinum wire

Pseudo reference electrode: Silver wire

Supporting electrolyte: Tetrabutylammonium tetrafluoroborate Fluka 0.1 M

Solvent : DMSO

DMSO was degassed with argon prior to the measurements. All experiments were performed under argon atmosphere. Ferrocene was used as an internal reference for the reduction and oxidation potentials.



|                            |                                             |
|----------------------------|---------------------------------------------|
| [-] Nested procedure       |                                             |
| [+] Autolab control        |                                             |
| [+] Set potential          | 0.000                                       |
| [+] Set cell               | On                                          |
| [+] Wait time (s)          | 5                                           |
| Optimize current range     | 5                                           |
| [-] CV staircase           | [0.000, 1.600, -1.800, 0.000, 6, 0.0500000] |
| Start potential (V)        | 0.000                                       |
| Upper vertex potential (V) | 1.600                                       |
| Lower vertex potential (V) | -1.800                                      |
| Stop potential (V)         | 0.000                                       |
| Number of stop crossings   | 6                                           |
| Step potential (V)         | -0.00488                                    |
| Scan rate (V/s)            | 0.0500000                                   |
| Estimated number of poin.. | 4192                                        |
| Interval time (s)          | 0.097656                                    |



Reduction and oxidation potentials of compound **1b** (DMSO)

| Without Acid                                                                                                              | With Acid                                                                                                                 |
|---------------------------------------------------------------------------------------------------------------------------|---------------------------------------------------------------------------------------------------------------------------|
| $E_{\text{Ox(DMSO)}} = +0,37 \text{ V vs. Fe}^+/\text{Fe}$<br>$E_{\text{Red(DMSO)}} = -1,87 \text{ V vs. Fe}^+/\text{Fe}$ | $E_{\text{Ox(DMSO)}} = +0,90 \text{ V vs. Fe}^+/\text{Fe}$<br>$E_{\text{Red(DMSO)}} = -1,87 \text{ V vs. Fe}^+/\text{Fe}$ |

## 6) Stern-Volmer analysis for $\text{Ru}(\text{bpy})_3\text{Cl}_2 \cdot 6 \text{H}_2\text{O}$ + compound **1b**



Left figure: Changes in the fluorescence spectra (in this case intensity) of  $\text{Ru}(\text{bpy})_3\text{Cl}_2 \cdot 6 \text{H}_2\text{O}$  upon successive addition of 4-chlorobenzoyl azide.

Right figure: Changes in the fluorescence spectra (in this case intensity) of  $\text{Ru}(\text{bpy})_3\text{Cl}_2 \cdot 6 \text{H}_2\text{O}$  upon successive addition of 4-chlorobenzoyl azide in the presence of  $\text{H}_3\text{PO}_4$  (19.1 mg/mL).

Emission quenching of  $\text{Ru}(\text{bpy})_3\text{Cl}_2 \cdot 6 \text{H}_2\text{O}$  in the presence of increasing amounts of compound **1g** in DMSO at 25 °C. The concentration of  $\text{Ru}(\text{bpy})_3\text{Cl}_2 \cdot 6 \text{H}_2\text{O}$  was 0.05 mM and the concentration of **1g** was increased from 0 to 0.25 mM. Excitation wavelength was 455 nm.



Stern-Volmer plot for  $\text{Ru}(\text{bpy})_3\text{Cl}_2 \cdot 6 \text{H}_2\text{O}$  + compound **1g** in DMSO at 25 °C. The concentration of  $\text{Ru}(\text{bpy})_3\text{Cl}_2 \cdot 6 \text{H}_2\text{O}$  was 0.05 mM. Excitation wavelength was 455 nm. 19.1 mg/mL  $\text{H}_3\text{PO}_4$ .

Fluorescence emission spectra were recorded on a Cary Eclipse Fluorescence spectrophotometer. Solutions containing  $\text{Ru}(\text{bpy})_3\text{Cl}_2 \cdot 6 \text{H}_2\text{O}$  with varying concentrations of the quencher were excited at

455 nm and the emission intensities at ca. 620 nm were determined. DMSO was degassed before measurements.  $I_0$  and  $I$  represent the intensities of the emission in the absence and presence of the quencher at ca. 620 nm.

The triplet energy of acyl azides is reported to be  $\sim 41$  kcal/mol.<sup>10</sup> The triplet energy of phenyl azide is estimated to be 68 kcal/mol.<sup>11</sup>

## 7) Time profile of the reaction of **1b** with **2a** with and without blue light irradiation.



We performed an experiment with “on-off” switching of the light source in the reaction of compound **1b** and **2a** under standard condition with mesitylene as internal standard. The internal standard was added to the reaction mixture with the substrates. We start with 30 min of irradiation followed by 30 min stirring in the dark. Next, 1 hour of irradiation followed by 1 hour of stirring in the dark. One additional hour of irradiation is needed to complete the reaction in this case. Without light the reaction conversion stops immediately. The conversion of **1b** was determined by GC using mesitylene as the internal standard. The results indicate that the reaction is not a radical chain process and the conversion requires the light excitation.



## 8) GC-MS analysis of crude reaction mixtures

File :M:\GCMS\Ghosh(T)\G0866\_00.D  
Operator : R. Vasold  
Acquired : 19 Sep 2014 10:25 using AcqMethod G0866\_00.M  
Instrument : MSD 5975 PAL2  
Sample Name: TG-EB-C6  
Misc Info :  
Vial Number: 1



Reaction conditions: Compound **1b**, *N*-methylpyrrole, Ru(bpy)<sub>3</sub>Cl<sub>2</sub> · 6 H<sub>2</sub>O in DMSO under N<sub>2</sub>. Blue LED ( $\lambda_{\text{Ex}} = 455 \text{ nm}$ ) irradiation for 1.5 hours.

File :M:\GCMS\Ghosh(T)\G0867\_04.D  
Operator : R. Vasold  
Acquired : 22 Sep 2014 15:16 using AcqMethod G0867\_00.M  
Instrument : MSD 5975 PAL2  
Sample Name: TG-EB-C11  
Misc Info :  
Vial Number: 5



Reaction conditions: Compound **1b** and  $\text{Ru}(\text{bpy})_3\text{Cl}_2 \cdot 6 \text{H}_2\text{O}$  were irradiated in DMSO under  $\text{N}_2$  with a blue LED ( $\lambda_{\text{Ex}} = 455 \text{ nm}$ ) for 1.5 hours.

File :M:\GCMS\Ghosh(T)\G0866\_01.D  
 Operator : R. Vasold  
 Acquired : 19 Sep 2014 11:35 using AcqMethod G0866\_00.M  
 Instrument : MSD 5975 PAL2  
 Sample Name: TG-EB-C7  
 Misc Info :  
 Vial Number: 1



Reaction conditions: Compound **1b**, N-methylpyrrole, Ru(bpy)<sub>3</sub>Cl<sub>2</sub> · 6 H<sub>2</sub>O and H<sub>3</sub>PO<sub>4</sub> in DMSO under N<sub>2</sub>. Irradiation by blue LED ( $\lambda_{\text{Ex}} = 455 \text{ nm}$ ) for 1.5 hours.

File :M:\GCMS\Ghosh(T)\G0866\_01.D  
 Operator : R. Vasold  
 Acquired : 19 Sep 2014 11:35 using AcqMethod G0866\_00.M  
 Instrument : MSD 5975 PAL2  
 Sample Name: TG-EB-C7  
 Misc Info :  
 Vial Number: 1



Reaction conditions: Compound **1b**, *N*-methylpyrrole, Ru(bpy)<sub>3</sub>Cl<sub>2</sub> · 6 H<sub>2</sub>O and H<sub>3</sub>PO<sub>4</sub> in DMSO under N<sub>2</sub>. Irradiation by blue LED ( $\lambda_{\text{Ex}}$  = 455 nm) for 1.5 hours.

## 9) References

---

- <sup>1</sup> A. R. Katritzky, K. Widyan, K. Kirichenko *J. Org. Chem.* **2007**, *72*, 5802.
- <sup>2</sup> S. De Sarkar, A. Studer *Org. Lett.*, **2010**, *12*, 1992.
- <sup>3</sup> Z. Zhong, J. Hu, X. Wang, J. Liu, L. Zhang *Synth. Commun.* **2011**, *41*, 2461.
- <sup>4</sup> N. D. Arote, K. G. Akamanchi *Tetrahedron Lett.* **2007**, *48*, 5661.
- <sup>5</sup> T. Shingaki, *Nippon Kagaku Zasshi* **1959**, *80*, 55.
- <sup>6</sup> Z. Zhong, J. Hu, X. Wang, J. Liu, L. Zhang *Synth. Commun.* **2011**, *41*, 2461.
- <sup>7</sup> N. D. Arote, K. G. Akamanchi *Tetrahedron Lett.* **2007**, *48*, 5661.
- <sup>8</sup> D. Blanger, X. Tong, S. Soumar, Y. L. Dory, Y. Zhao *Chem. Eur. J.* **2009**, *15*, 4428.
- <sup>9</sup> A. Carrër, J.-C. Florent, E. Auvrouin, P. Rousselle, E. Bertounesque *J. Org. Chem.*, **2011**, *76*, 2502.
- <sup>10</sup> M. Sukigara, K. Honda, S. Kikuchi, *J. Soc. Photographic Sci. Techn. Japan*, **1971**, *34*, 209.
- <sup>11</sup> L. J. Leyshon, A. Reiser *J. Chem. Soc., Faraday Trans. 2*, **1972**, *68*, 1918.
